# Supplementary material
Source: MDPI journal article supplement (https://www.mdpi.com/2073-4352/10/7/558)

# checkCIF/PLATON report

Structure factors have been supplied for datablock(s) C16H18N3S3FeCN6x12p36H2O

THIS REPORT IS FOR GUIDANCE ONLY. IF USED AS PART OF A REVIEW PROCEDURE FOR PUBLICATION, IT SHOULD NOT REPLACE THE EXPERTISE OF AN EXPERIENCED CRYSTALLOGRAPHIC REFEREE.

No syntax errors found.      CIF dictionary      Interpreting this report

## Datablock: C16H18N3S3FeCN6x12p36H2O

---

Bond precision:    C-C = 0.0061 Å

Wavelength=0.70000

Cell:                    a=9.7710(19)                    b=12.201(2)                    c=13.651(3)  
                          alpha=84.18(3)                    beta=72.06(3)                    gamma=89.45(3)  
Temperature:            100 K

|                        | Calculated                              | Reported                                |
|------------------------|-----------------------------------------|-----------------------------------------|
| Volume                 | 1539.9(6)                               | 1539.9(6)                               |
| Space group            | P 1                                     | P 1                                     |
| Hall group             | P 1                                     | P 1                                     |
| Moiety formula         | 3(C16 H18 N3 S), C6 Fe N6, 12.361(H2 O) | 3(C16 H18 N3 S), C6 Fe N6, 12.361(H2 O) |
| Sum formula            | C54 H78.72 Fe N15 O12.36 S3             | C54 H78.72 Fe N15 O12.36 S3             |
| Mr                     | 1287.85                                 | 1287.83                                 |
| Dx, g cm <sup>-3</sup> | 1.389                                   | 1.389                                   |
| Z                      | 1                                       | 1                                       |
| Mu (mm <sup>-1</sup> ) | 0.399                                   | 0.404                                   |
| F000                   | 680.6                                   | 681.0                                   |
| F000'                  | 681.56                                  |                                         |
| h,k,lmax               | 12,15,17                                | 12,15,17                                |
| Nref                   | 12612[ 6306]                            | 10607                                   |
| Tmin,Tmax              |                                         | 0.321,1.000                             |
| Tmin'                  |                                         |                                         |

Correction method= # Reported T Limits: Tmin=0.321 Tmax=1.000  
AbsCorr = MULTI-SCAN

Data completeness= 1.68/0.84

Theta(max)= 25.944

R(reflections)= 0.0439( 10495)

wR2(reflections)= 0.1202( 10607)

S = 1.053

Npar= 849

---

🟡 **Alert level C**

STRVA01\_ALERT\_4\_C                      Flack test results are ambiguous.

                    From the CIF: \_refine\_ls\_abs\_structure Flack            0.376

                    From the CIF: \_refine\_ls\_abs\_structure Flack su        0.014

```
STRVA01_ALERT_4_C          Flack test results are ambiguous.
      From the CIF: _refine_ls_abs_structure_Flack          0.376
      From the CIF: _refine_ls_abs_structure_Flack_su       0.014
```

PLAT029 ALERT 3 C diffn measured fraction theta full value Low . 0.971 Why?

PLAT077 ALERT 4 C Unitcell Contains Non-integer Number of Atoms .. Please Check

PLAT090\_ALERT 3 C Poor Data / Parameter Ratio (Zmax &gt; 18) ..... 7.21 Note

PLAT341\_ALERT\_3\_C Low Bond Precision on C-C Bonds ..... 0.00606 Ang.

PLAT412\_ALERT\_2\_C Short Intra XH3 .. XHn        H44            ..H48B          .            1.86 Ang.  
x,y,z =            1.555 Check

**Author Response:** Hydrogen atoms positions were refined after locating them as electron density maxima and therefore fixing their positions. As many H atoms were disordered in more than two locations for each water molecules, the final model contain some short H-H contacts, when these are not recognised as belonging to different disordered parts.

PLAT417\_ALERT\_2\_C Short Inter D-H..H-D            H8B            ..H9B            .            2.12 Ang.  
x,y,z =            1.555 Check

**Author Response:** Hydrogen atoms positions were refined after locating them as electron density maxima and therefore fixing their positions. As many H atoms were disordered in more than two locations for each water molecules, the final model contain some short H-H contacts, when these are not recognised as belonging to different disordered parts.

|                   |                                                 |     |        |
|-------------------|-------------------------------------------------|-----|--------|
| PLAT790_ALERT_4_C | Centre of Gravity not Within Unit Cell: Resd. # | 1   | Note   |
|                   | C16 H18 N3 S                                    |     |        |
| PLAT911_ALERT_3_C | Missing FCF Refl Between Thmin & STh/L= 0.600   | 159 | Report |

**Author Response:** The synchrotron measurement conducted consisted in the only full 360 degrees rotation around the spindle axis, thus resulting in a fraction of the reciprocal space left uncollected.

Alert level G

|                   |                                                                                       |         |        |
|-------------------|---------------------------------------------------------------------------------------|---------|--------|
| ABSMU01_ALERT_1_G | Calculation of _exptl_absorpt_correction_mu<br>not performed for this radiation type. |         |        |
| PLAT002_ALERT_2_G | Number of Distance or Angle Restraints on AtSite                                      | 10      | Note   |
| PLAT007_ALERT_5_G | Number of Unrefined Donor-H Atoms .....                                               | 26      | Report |
| PLAT033_ALERT_4_G | Flack x Value Deviates > 3.0 * sigma from Zero .                                      | 0.376   | Note   |
| PLAT042_ALERT_1_G | Calc. and Reported MoietyFormula Strings Differ                                       | Please  | Check  |
| PLAT092_ALERT_4_G | Check: Wavelength Given is not Cu,Ga,Mo,Ag,In Ka                                      | 0.70000 | Ang.   |
| PLAT154_ALERT_1_G | The s.u.'s on the Cell Angles are Equal ..(Note)                                      | 0.03    | Degree |
| PLAT172_ALERT_4_G | The CIF-Embedded .res File Contains DFIX Records                                      | 6       | Report |
| PLAT173_ALERT_4_G | The CIF-Embedded .res File Contains DANG Records                                      | 3       | Report |
| PLAT174_ALERT_4_G | The CIF-Embedded .res File Contains FLAT Records                                      | 7       | Report |
| PLAT302_ALERT_4_G | Anion/Solvent/Minor-Residue Disorder (Resd 16 )                                       | 100%    | Note   |
| PLAT302_ALERT_4_G | Anion/Solvent/Minor-Residue Disorder (Resd 17 )                                       | 100%    | Note   |
| PLAT302_ALERT_4_G | Anion/Solvent/Minor-Residue Disorder (Resd 18 )                                       | 100%    | Note   |
| PLAT304_ALERT_4_G | Non-Integer Number of Atoms in ..... (Resd 16 )                                       | 1.92    | Check  |
| PLAT304_ALERT_4_G | Non-Integer Number of Atoms in ..... (Resd 17 )                                       | 1.08    | Check  |
| PLAT304_ALERT_4_G | Non-Integer Number of Atoms in ..... (Resd 18 )                                       | 1.08    | Check  |
| PLAT380_ALERT_4_G | Incorrectly? Oriented X(sp <sup>2</sup> )-Methyl Moiety .....                         | C33     | Check  |
| PLAT415_ALERT_2_G | Short Inter D-H..H-X            H31B        ..H12A        .                           | 2.03    | Ang.   |
|                   | -1+x,y,1+z =                                                                          | 1_456   | Check  |
| PLAT415_ALERT_2_G | Short Inter D-H..H-X            H40            ..H2CC        .                        | 1.70    | Ang.   |
|                   | -1+x,-1+y,z =                                                                         | 1_445   | Check  |
| PLAT417_ALERT_2_G | Short Inter D-H..H-D            H11B        ..H12A        .                           | 2.10    | Ang.   |
|                   | x,y,z =                                                                               | 1_555   | Check  |

**Author Response:** Hydrogen atoms positions were refined after locating them as electron density maxima and therefore fixing their positions. As many H atoms were disordered in more than two locations for each water molecules, the final model contain some short H-H contacts, when these are not recognised as belonging to different disordered parts.

|                   |                                                                 |   |      |
|-------------------|-----------------------------------------------------------------|---|------|
| PLAT720_ALERT_4_G | Number of Unusual/Non-Standard Labels .....                     | 4 | Note |
| PLAT790_ALERT_4_G | Centre of Gravity not Within Unit Cell: Resd. #<br>C16 H18 N3 S | 2 | Note |
| PLAT790_ALERT_4_G | Centre of Gravity not Within Unit Cell: Resd. #                 | 5 | Note |

```

H2 O
PLAT790_ALERT_4_G Centre of Gravity not Within Unit Cell: Resd. #          6 Note
H2 O
PLAT794_ALERT_5_G Tentative Bond Valency for Fe01      (III)      .      3.05 Info
PLAT860_ALERT_3_G Number of Least-Squares Restraints .....      22 Note
PLAT870_ALERT_4_G ALERTS Related to Twinning Effects Suppressed ..      ! Info
PLAT912_ALERT_4_G Missing # of FCF Reflections Above STh/L= 0.600      23 Note
PLAT913_ALERT_3_G Missing # of Very Strong Reflections in FCF ....      2 Note
PLAT933_ALERT_2_G Number of OMIT Records in Embedded .res File ...      1 Note
PLAT941_ALERT_3_G Average HKL Measurement Multiplicity .....      3.1 Low
PLAT984_ALERT_1_G The Fe-f' = 0.3555 Deviates from the B&C-Value      0.3456 Check

```

---

```

0 ALERT level A = Most likely a serious problem - resolve or explain
0 ALERT level B = A potentially serious problem, consider carefully
9 ALERT level C = Check. Ensure it is not caused by an omission or oversight
32 ALERT level G = General information/check it is not something unexpected

4 ALERT type 1 CIF construction/syntax error, inconsistent or missing data
7 ALERT type 2 Indicator that the structure model may be wrong or deficient
7 ALERT type 3 Indicator that the structure quality may be low
21 ALERT type 4 Improvement, methodology, query or suggestion
2 ALERT type 5 Informative message, check

```

---

## Validation response form

Please find below a validation response form (VRF) that can be filled in and pasted into your CIF.

```

# start Validation Reply Form
_vrf_PLAT790_C16H18N3S3FeCN6x12p36H2O
;
PROBLEM: Centre of Gravity not Within Unit Cell: Resd. #          1 Note
RESPONSE: ...
;
# end Validation Reply Form

```

---

It is advisable to attempt to resolve as many as possible of the alerts in all categories. Often the minor alerts point to easily fixed oversights, errors and omissions in your CIF or refinement strategy, so attention to these fine details can be worthwhile. In order to resolve some of the more serious problems it may be necessary to carry out additional measurements or structure refinements. However, the purpose of your study may justify the reported deviations and the more serious of these should normally be commented upon in the discussion or experimental section of a paper or in the "special\_details" fields of the CIF. checkCIF was carefully designed to identify outliers and unusual parameters, but every test has its limitations and alerts that are not important in a particular case may appear. Conversely, the absence of alerts does not guarantee there are no aspects of the results needing attention. It is up to the individual to critically assess their own results and, if necessary, seek expert advice.

### **Publication of your CIF in IUCr journals**

A basic structural check has been run on your CIF. These basic checks will be run on all CIFs submitted for publication in IUCr journals (*Acta Crystallographica*, *Journal of Applied Crystallography*, *Journal of Synchrotron Radiation*); however, if you intend to submit to *Acta Crystallographica Section C* or *E* or *IUCrData*, you should make sure that full publication checks are run on the final version of your CIF prior to submission.

### **Publication of your CIF in other journals**

Please refer to the *Notes for Authors* of the relevant journal for any special instructions relating to CIF submission.

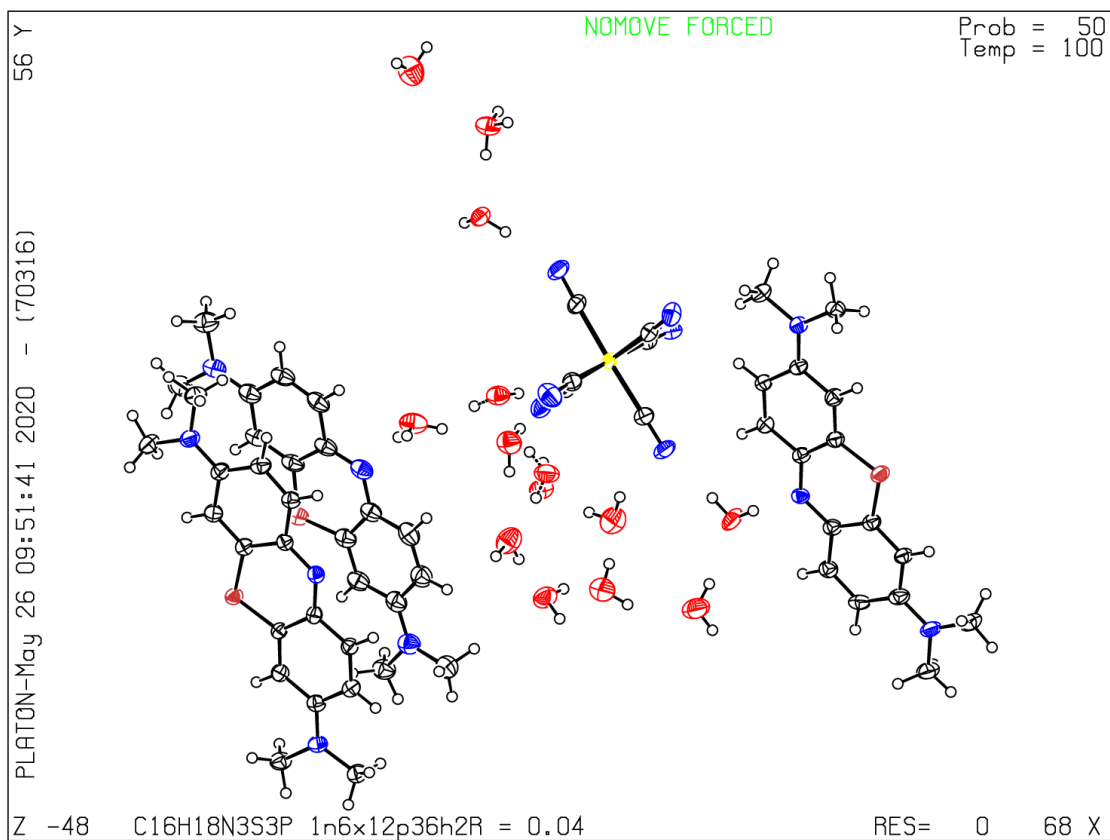

Supplement: s1 [file s1]
