# Supplementary material
Source: MDPI journal article supplement (https://www.mdpi.com/2073-4352/10/7/558)

# checkCIF/PLATON report

Structure factors have been supplied for datablock(s) C16H18N3S3FeCN6xH2O

THIS REPORT IS FOR GUIDANCE ONLY. IF USED AS PART OF A REVIEW PROCEDURE FOR PUBLICATION, IT SHOULD NOT REPLACE THE EXPERTISE OF AN EXPERIENCED CRYSTALLOGRAPHIC REFEREE.

No syntax errors found.      CIF dictionary      Interpreting this report

## Datablock: C16H18N3S3FeCN6xH2O

---

|                 |                                                                  |                                                              |
|-----------------|------------------------------------------------------------------|--------------------------------------------------------------|
| Bond precision: | C-C = 0.0058 A                                                   | Wavelength=0.70000                                           |
| Cell:           | a=10.8838(4)                                                     | b=15.2399(5)      c=15.4106(6)                               |
|                 | alpha=90                                                         | beta=102.913(4)      gamma=90                                |
| Temperature:    | 100 K                                                            |                                                              |
|                 | Calculated                                                       | Reported                                                     |
| Volume          | 2491.48(16)                                                      | 2491.48(16)                                                  |
| Space group     | P 21/n                                                           | P 1 21/n 1                                                   |
| Hall group      | -P 2yn                                                           | -P 2yn                                                       |
| Moiety formula  | C16 H18 N4 S2, 2(C6 Fe N6), 4(C16 H18 N3 S), 2(C8 H9 N), 2(H2 O) | C6 Fe N6, 2(C16 H18 N3 S), 0.5(C16 H18 N4 S2), C8 H9 N, H2 O |
| Sum formula     | C108 H112 Fe2 N30 O2 S6                                          | C54 H56 Fe N15 O S3                                          |
| Mr              | 2166.34                                                          | 1083.16                                                      |
| Dx, g cm-3      | 1.444                                                            | 1.444                                                        |
| Z               | 1                                                                | 2                                                            |
| Mu (mm-1)       | 0.464                                                            | 0.469                                                        |
| F000            | 1134.0                                                           | 1134.0                                                       |
| F000'           | 1135.67                                                          |                                                              |
| h,k,lmax        | 14,20,20                                                         | 14,20,20                                                     |
| Nref            | 5943                                                             | 5924                                                         |
| Tmin,Tmax       |                                                                  | 0.324,1.000                                                  |
| Tmin'           |                                                                  |                                                              |

Correction method= # Reported T Limits: Tmin=0.324 Tmax=1.000  
AbsCorr = MULTI-SCAN

Data completeness= 0.997      Theta(max)= 27.421

R(reflections)= 0.0790( 4670)      wR2(reflections)= 0.2146( 5924)

S = 1.056      Npar= 456

---

The following ALERTS were generated. Each ALERT has the format  
**test-name\_ALERT\_alert-type\_alert-level.**  
Click on the hyperlinks for more details of the test.

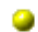

### Alert level C

PLAT234\_ALERT\_4\_C Large Hirshfeld Difference N4 --C15 . 0.16 Ang.

**Author Response: The presence of static displative disorder negatively influences the value at issue.**

PLAT250\_ALERT\_2\_C Large U3/U1 Ratio for Average U(i,j) Tensor ... 2.3 Note

**Author Response: The presence of static displative disorder negatively influences the value at issue.**

PLAT906\_ALERT\_3\_C Large K Value in the Analysis of Variance ..... 6.903 Check

**Author Response: The presence of static displative disorder negatively influences the value at issue.**

PLAT911\_ALERT\_3\_C Missing FCF Refl Between Thmin & STh/L= 0.600 18 Report

**Author Response: The synchrotron measurement conducted consisted in the only full 360 degrees rotation around the spindle axis, thus resulting in a fraction of the reciprocal space left uncollected.**

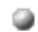

### Alert level G

ABSMU01\_ALERT\_1\_G Calculation of \_exptl\_absorpt\_correction\_mu  
not performed for this radiation type.

|                   |                                                  |         |        |
|-------------------|--------------------------------------------------|---------|--------|
| PLAT002_ALERT_2_G | Number of Distance or Angle Restraints on AtSite | 28      | Note   |
| PLAT003_ALERT_2_G | Number of Uiso or Uij Restrained non-H Atoms ... | 9       | Report |
| PLAT042_ALERT_1_G | Calc. and Reported MoietyFormula Strings Differ  | Please  | Check  |
| PLAT045_ALERT_1_G | Calculated and Reported Z Differ by a Factor ... | 0.50    | Check  |
| PLAT083_ALERT_2_G | SHELXL Second Parameter in WGHT Unusually Large  | 5.92    | Why ?  |
| PLAT092_ALERT_4_G | Check: Wavelength Given is not Cu,Ga,Mo,Ag,In Ka | 0.70000 | Ang.   |
| PLAT172_ALERT_4_G | The CIF-Embedded .res File Contains DFIX Records | 10      | Report |
| PLAT173_ALERT_4_G | The CIF-Embedded .res File Contains DANG Records | 14      | Report |
| PLAT174_ALERT_4_G | The CIF-Embedded .res File Contains FLAT Records | 3       | Report |
| PLAT178_ALERT_4_G | The CIF-Embedded .res File Contains SIMU Records | 2       | Report |
| PLAT186_ALERT_4_G | The CIF-Embedded .res File Contains ISOR Records | 3       | Report |
| PLAT187_ALERT_4_G | The CIF-Embedded .res File Contains RIGU Records | 4       | Report |
| PLAT300_ALERT_4_G | Atom Site Occupancy of S1 Constrained at         | 0.5     | Check  |
| PLAT300_ALERT_4_G | Atom Site Occupancy of N1 Constrained at         | 0.5     | Check  |
| PLAT300_ALERT_4_G | Atom Site Occupancy of N8A Constrained at        | 0.5     | Check  |
| PLAT300_ALERT_4_G | Atom Site Occupancy of C20A Constrained at       | 0.5     | Check  |
| PLAT300_ALERT_4_G | Atom Site Occupancy of C21A Constrained at       | 0.5     | Check  |
| PLAT300_ALERT_4_G | Atom Site Occupancy of C22A Constrained at       | 0.5     | Check  |
| PLAT300_ALERT_4_G | Atom Site Occupancy of C23A Constrained at       | 0.5     | Check  |
| PLAT300_ALERT_4_G | Atom Site Occupancy of C24A Constrained at       | 0.5     | Check  |
| PLAT300_ALERT_4_G | Atom Site Occupancy of C25A Constrained at       | 0.5     | Check  |
| PLAT300_ALERT_4_G | Atom Site Occupancy of C26A Constrained at       | 0.5     | Check  |
| PLAT300_ALERT_4_G | Atom Site Occupancy of C27A Constrained at       | 0.5     | Check  |

|                   |                                                  |                |        |       |
|-------------------|--------------------------------------------------|----------------|--------|-------|
| PLAT300_ALERT_4_G | Atom Site Occupancy of H22A                      | Constrained at | 0.5    | Check |
| PLAT300_ALERT_4_G | Atom Site Occupancy of H23A                      | Constrained at | 0.5    | Check |
| PLAT300_ALERT_4_G | Atom Site Occupancy of H25A                      | Constrained at | 0.5    | Check |
| PLAT300_ALERT_4_G | Atom Site Occupancy of H26A                      | Constrained at | 0.5    | Check |
| PLAT300_ALERT_4_G | Atom Site Occupancy of H26B                      | Constrained at | 0.5    | Check |
| PLAT300_ALERT_4_G | Atom Site Occupancy of H26C                      | Constrained at | 0.5    | Check |
| PLAT300_ALERT_4_G | Atom Site Occupancy of H27A                      | Constrained at | 0.5    | Check |
| PLAT300_ALERT_4_G | Atom Site Occupancy of H27B                      | Constrained at | 0.5    | Check |
| PLAT300_ALERT_4_G | Atom Site Occupancy of H27C                      | Constrained at | 0.5    | Check |
| PLAT300_ALERT_4_G | Atom Site Occupancy of N5                        | Constrained at | 0.5    | Check |
| PLAT300_ALERT_4_G | Atom Site Occupancy of N5A                       | Constrained at | 0.5    | Check |
| PLAT300_ALERT_4_G | Atom Site Occupancy of N7                        | Constrained at | 0.5    | Check |
| PLAT300_ALERT_4_G | Atom Site Occupancy of N7A                       | Constrained at | 0.5    | Check |
| PLAT300_ALERT_4_G | Atom Site Occupancy of C17                       | Constrained at | 0.5    | Check |
| PLAT300_ALERT_4_G | Atom Site Occupancy of C17A                      | Constrained at | 0.5    | Check |
| PLAT300_ALERT_4_G | Atom Site Occupancy of C19                       | Constrained at | 0.5    | Check |
| PLAT300_ALERT_4_G | Atom Site Occupancy of C19A                      | Constrained at | 0.5    | Check |
| PLAT300_ALERT_4_G | Atom Site Occupancy of N8B                       | Constrained at | 0.5    | Check |
| PLAT300_ALERT_4_G | Atom Site Occupancy of C20B                      | Constrained at | 0.5    | Check |
| PLAT300_ALERT_4_G | Atom Site Occupancy of C21B                      | Constrained at | 0.5    | Check |
| PLAT300_ALERT_4_G | Atom Site Occupancy of C22B                      | Constrained at | 0.5    | Check |
| PLAT300_ALERT_4_G | Atom Site Occupancy of C23B                      | Constrained at | 0.5    | Check |
| PLAT300_ALERT_4_G | Atom Site Occupancy of C24B                      | Constrained at | 0.5    | Check |
| PLAT300_ALERT_4_G | Atom Site Occupancy of C25B                      | Constrained at | 0.5    | Check |
| PLAT300_ALERT_4_G | Atom Site Occupancy of C26B                      | Constrained at | 0.5    | Check |
| PLAT300_ALERT_4_G | Atom Site Occupancy of C27B                      | Constrained at | 0.5    | Check |
| PLAT300_ALERT_4_G | Atom Site Occupancy of H22B                      | Constrained at | 0.5    | Check |
| PLAT300_ALERT_4_G | Atom Site Occupancy of H23B                      | Constrained at | 0.5    | Check |
| PLAT300_ALERT_4_G | Atom Site Occupancy of H25B                      | Constrained at | 0.5    | Check |
| PLAT300_ALERT_4_G | Atom Site Occupancy of H26D                      | Constrained at | 0.5    | Check |
| PLAT300_ALERT_4_G | Atom Site Occupancy of H26E                      | Constrained at | 0.5    | Check |
| PLAT300_ALERT_4_G | Atom Site Occupancy of H26F                      | Constrained at | 0.5    | Check |
| PLAT300_ALERT_4_G | Atom Site Occupancy of H27D                      | Constrained at | 0.5    | Check |
| PLAT300_ALERT_4_G | Atom Site Occupancy of H27E                      | Constrained at | 0.5    | Check |
| PLAT300_ALERT_4_G | Atom Site Occupancy of H27F                      | Constrained at | 0.5    | Check |
| PLAT300_ALERT_4_G | Atom Site Occupancy of O1                        | Constrained at | 0.5    | Check |
| PLAT300_ALERT_4_G | Atom Site Occupancy of H1D                       | Constrained at | 0.5    | Check |
| PLAT300_ALERT_4_G | Atom Site Occupancy of H1E                       | Constrained at | 0.5    | Check |
| PLAT301_ALERT_3_G | Main Residue Disorder .....(Resd 1 )             |                | 100%   | Note  |
| PLAT302_ALERT_4_G | Anion/Solvent/Minor-Residue Disorder (Resd 2 )   |                | 62%    | Note  |
| PLAT302_ALERT_4_G | Anion/Solvent/Minor-Residue Disorder (Resd 4 )   |                | 100%   | Note  |
| PLAT302_ALERT_4_G | Anion/Solvent/Minor-Residue Disorder (Resd 5 )   |                | 100%   | Note  |
| PLAT304_ALERT_4_G | Non-Integer Number of Atoms in ..... (Resd 5 )   |                | 1.50   | Check |
| PLAT413_ALERT_2_G | Short Inter XH3 .. XHn H15C ..H26F .             |                | 2.07   | Ang.  |
|                   | -1/2+x,1/2-y,1/2+z =                             |                | 4_566  | Check |
| PLAT764_ALERT_4_G | Overcomplete CIF Bond List Detected (Rep/Expd) . |                | 1.14   | Ratio |
| PLAT779_ALERT_4_G | Suspect or Irrelevant (Bond) Angle(s) in CIF . # |                | 109    | Check |
|                   | C21A -C20A -S1 1.555 1.555 3.655                 |                | 30.00  | Deg.  |
| PLAT779_ALERT_4_G | Suspect or Irrelevant (Bond) Angle(s) in CIF . # |                | 112    | Check |
|                   | S1 -C20A -N1 1.555 1.555 3.655                   |                | 7.80   | Deg.  |
| PLAT779_ALERT_4_G | Suspect or Irrelevant (Bond) Angle(s) in CIF . # |                | 131    | Check |
|                   | S1 -C21A -N1 3.655 1.555 1.555                   |                | 10.70  | Deg.  |
| PLAT779_ALERT_4_G | Suspect or Irrelevant (Bond) Angle(s) in CIF . # |                | 174    | Check |
|                   | C21A -S1 -C20A 3.655 1.555 3.655                 |                | 34.20  | Deg.  |
| PLAT811_ALERT_5_G | No ADDSYM Analysis: Too Many Excluded Atoms .... |                | !      | Info  |
| PLAT860_ALERT_3_G | Number of Least-Squares Restraints .....         |                | 135    | Note  |
| PLAT912_ALERT_4_G | Missing # of FCF Reflections Above STh/L= 0.600  |                | 1      | Note  |
| PLAT933_ALERT_2_G | Number of OMIT Records in Embedded .res File ... |                | 16     | Note  |
| PLAT978_ALERT_2_G | Number C-C Bonds with Positive Residual Density. |                | 1      | Info  |
| PLAT984_ALERT_1_G | The Fe-f' = 0.3560 Deviates from the B&C-Value   |                | 0.3456 | Check |

---

0 **ALERT level A** = Most likely a serious problem - resolve or explain  
0 **ALERT level B** = A potentially serious problem, consider carefully  
4 **ALERT level C** = Check. Ensure it is not caused by an omission or oversight  
79 **ALERT level G** = General information/check it is not something unexpected

4 ALERT type 1 CIF construction/syntax error, inconsistent or missing data  
7 ALERT type 2 Indicator that the structure model may be wrong or deficient  
4 ALERT type 3 Indicator that the structure quality may be low  
67 ALERT type 4 Improvement, methodology, query or suggestion  
1 ALERT type 5 Informative message, check

---

It is advisable to attempt to resolve as many as possible of the alerts in all categories. Often the minor alerts point to easily fixed oversights, errors and omissions in your CIF or refinement strategy, so attention to these fine details can be worthwhile. In order to resolve some of the more serious problems it may be necessary to carry out additional measurements or structure refinements. However, the purpose of your study may justify the reported deviations and the more serious of these should normally be commented upon in the discussion or experimental section of a paper or in the "special\_details" fields of the CIF. checkCIF was carefully designed to identify outliers and unusual parameters, but every test has its limitations and alerts that are not important in a particular case may appear. Conversely, the absence of alerts does not guarantee there are no aspects of the results needing attention. It is up to the individual to critically assess their own results and, if necessary, seek expert advice.

### **Publication of your CIF in IUCr journals**

A basic structural check has been run on your CIF. These basic checks will be run on all CIFs submitted for publication in IUCr journals (*Acta Crystallographica*, *Journal of Applied Crystallography*, *Journal of Synchrotron Radiation*); however, if you intend to submit to *Acta Crystallographica Section C* or *E* or *IUCrData*, you should make sure that full publication checks are run on the final version of your CIF prior to submission.

### **Publication of your CIF in other journals**

Please refer to the *Notes for Authors* of the relevant journal for any special instructions relating to CIF submission.

---

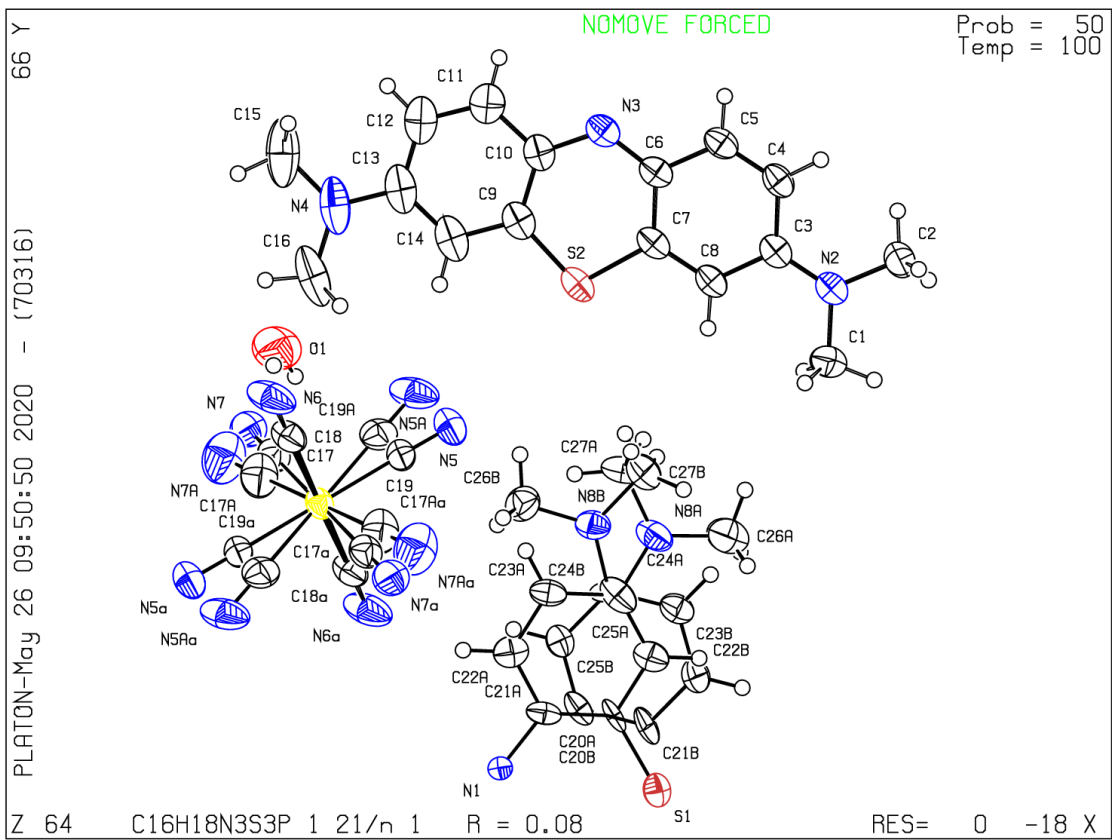

Supplement: s1 [file s1]
