# Supplementary material
Source: MDPI journal article supplement (https://www.mdpi.com/2073-4352/10/7/558)
Supplement: s1 [file s1]

# checkCIF/PLATON report

Structure factors have been supplied for datablock(s) C16H18N3SFeCN5NO

THIS REPORT IS FOR GUIDANCE ONLY. IF USED AS PART OF A REVIEW PROCEDURE FOR PUBLICATION, IT SHOULD NOT REPLACE THE EXPERTISE OF AN EXPERIENCED CRYSTALLOGRAPHIC REFEREE.

No syntax errors found.      CIF dictionary      Interpreting this report

## Datablock: C16H18N3SFeCN5NO

---

Bond precision:    C-C = 0.0043 Å                      Wavelength=0.70000

Cell:                      a=7.9790(2)              b=15.0782(2)              c=15.1639(2)  
                            alpha=90              beta=100.228(2)              gamma=90  
Temperature:              100 K

|                | Calculated                  | Reported                    |
|----------------|-----------------------------|-----------------------------|
| Volume         | 1795.36(6)                  | 1795.36(6)                  |
| Space group    | P 21/n                      | P 1 21/n 1                  |
| Hall group     | -P 2yn                      | -P 2yn                      |
| Moiety formula | C5 Fe N6 O, 2(C16 H18 N3 S) | 2(C16 H18 N3 S), C5 Fe N6 O |
| Sum formula    | C37 H36 Fe N12 O S2         | C37 H36 Fe N12 O S2         |
| Mr             | 784.75                      | 784.75                      |
| Dx,g cm-3      | 1.452                       | 1.452                       |
| Z              | 2                           | 2                           |
| Mu (mm-1)      | 0.559                       | 0.565                       |
| F000           | 816.0                       | 816.0                       |
| F000'          | 817.35                      |                             |
| h,k,lmax       | 10,19,19                    | 10,19,19                    |
| Nref           | 4288                        | 4163                        |
| Tmin,Tmax      |                             | 0.446,1.000                 |
| Tmin'          |                             |                             |

Correction method= # Reported T Limits: Tmin=0.446 Tmax=1.000  
AbsCorr = MULTI-SCAN

Data completeness= 0.971                      Theta(max)= 27.420

R(reflections)= 0.0706( 3513)              wR2(reflections)= 0.2060( 4163)

S = 1.040                      Npar= 282

---

The following ALERTS were generated. Each ALERT has the format  
**test-name\_ALERT\_alert-type\_alert-level**.  
Click on the hyperlinks for more details of the test.

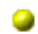

### Alert level C

PLAT029\_ALERT\_3\_C \_diffrn\_measured\_fraction\_theta\_full value Low . 0.975 Why?

**Author Response: The synchrotron measurement conducted consisted in the only full 360 degrees rotation around the spindle axis, thus resulting in a fraction of the reciprocal space left uncollected.**

PLAT250\_ALERT\_2\_C Large U3/U1 Ratio for Average U(i,j) Tensor .... 2.3 Note

**Author Response: The presence of static displacive disorder affects the U(i,j) components.**

PLAT412\_ALERT\_2\_C Short Intra XH3 .. XHn H2A ..H4 . 1.89 Ang.  
x,y,z = 1\_555 Check

**Author Response: The methyl-aromatic CH distance is a result of the geometry of the molecule. CH3 orientation was refined and converged to the reported value. This may be due to the presence of static disorder.**

PLAT906\_ALERT\_3\_C Large K Value in the Analysis of Variance ..... 4.173 Check

**Author Response: The presence of static displacive disorder negatively influences the value at issue.**

PLAT911\_ALERT\_3\_C Missing FCF Refl Between Thmin & STh/L= 0.600 80 Report

**Author Response: The synchrotron measurement conducted consisted in the only full 360 degrees rotation around the spindle axis, thus resulting in a fraction of the reciprocal space left uncollected.**

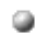

### Alert level G

ABSMU01\_ALERT\_1\_G Calculation of \_exptl\_absorpt\_correction\_mu  
not performed for this radiation type.

|                                                                    |              |
|--------------------------------------------------------------------|--------------|
| PLAT002_ALERT_2_G Number of Distance or Angle Restraints on AtSite | 11 Note      |
| PLAT003_ALERT_2_G Number of Uiso or Uij Restrained non-H Atoms ... | 8 Report     |
| PLAT042_ALERT_1_G Calc. and Reported MoietyFormula Strings Differ  | Please Check |
| PLAT072_ALERT_2_G SHELXL First Parameter in WGHT Unusually Large   | 0.11 Report  |
| PLAT092_ALERT_4_G Check: Wavelength Given is not Cu,Ga,Mo,Ag,In Ka | 0.70000 Ang. |
| PLAT153_ALERT_1_G The s.u.'s on the Cell Axes are Equal ..(Note)   | 0.0002 Ang.  |
| PLAT172_ALERT_4_G The CIF-Embedded .res File Contains DFIX Records | 12 Report    |
| PLAT173_ALERT_4_G The CIF-Embedded .res File Contains DANG Records | 2 Report     |
| PLAT174_ALERT_4_G The CIF-Embedded .res File Contains FLAT Records | 10 Report    |
| PLAT177_ALERT_4_G The CIF-Embedded .res File Contains DELU Records | 1 Report     |
| PLAT178_ALERT_4_G The CIF-Embedded .res File Contains SIMU Records | 2 Report     |
| PLAT186_ALERT_4_G The CIF-Embedded .res File Contains ISOR Records | 4 Report     |
| PLAT187_ALERT_4_G The CIF-Embedded .res File Contains RIGU Records | 1 Report     |
| PLAT232_ALERT_2_G Hirshfeld Test Diff (M-X) Fe1 --C19 .            | 17.7 s.u.    |

|                   |                                                  |           |                             |       |              |
|-------------------|--------------------------------------------------|-----------|-----------------------------|-------|--------------|
| PLAT232_ALERT_2_G | Hirshfeld Test Diff (M-X)                        | Fe1       | --N8                        | .     | 21.3 s.u.    |
| PLAT300_ALERT_4_G | Atom Site Occupancy of N4                        |           | Constrained at              |       | 0.75 Check   |
| PLAT300_ALERT_4_G | Atom Site Occupancy of N6                        |           | Constrained at              |       | 0.75 Check   |
| PLAT300_ALERT_4_G | Atom Site Occupancy of O1                        |           | Constrained at              |       | 0.25 Check   |
| PLAT300_ALERT_4_G | Atom Site Occupancy of O2                        |           | Constrained at              |       | 0.25 Check   |
| PLAT300_ALERT_4_G | Atom Site Occupancy of Cl7                       |           | Constrained at              |       | 0.75 Check   |
| PLAT300_ALERT_4_G | Atom Site Occupancy of Cl9                       |           | Constrained at              |       | 0.75 Check   |
| PLAT300_ALERT_4_G | Atom Site Occupancy of N7                        |           | Constrained at              |       | 0.25 Check   |
| PLAT300_ALERT_4_G | Atom Site Occupancy of N8                        |           | Constrained at              |       | 0.25 Check   |
| PLAT301_ALERT_3_G | Main Residue Disorder .....                      | (Resd 1 ) |                             |       | 62% Note     |
| PLAT432_ALERT_2_G | Short Inter X...Y Contact                        | N6        | ..Cl6                       |       | 2.90 Ang.    |
|                   |                                                  |           | x,y,z =                     | 1_555 | Check        |
| PLAT860_ALERT_3_G | Number of Least-Squares Restraints .....         |           |                             |       | 180 Note     |
| PLAT910_ALERT_3_G | Missing # of FCF Reflection(s) Below Theta(Min). |           |                             |       | 1 Note       |
| PLAT912_ALERT_4_G | Missing # of FCF Reflections Above STh/L=        | 0.600     |                             |       | 45 Note      |
| PLAT913_ALERT_3_G | Missing # of Very Strong Reflections in FCF .... |           |                             |       | 1 Note       |
| PLAT933_ALERT_2_G | Number of OMIT Records in Embedded .res File ... |           |                             |       | 29 Note      |
| PLAT978_ALERT_2_G | Number C-C Bonds with Positive Residual Density. |           |                             |       | 1 Info       |
| PLAT984_ALERT_1_G | The Fe-f' =                                      | 0.3555    | Deviates from the B&C-Value |       | 0.3456 Check |

---

0 **ALERT level A** = Most likely a serious problem - resolve or explain  
 0 **ALERT level B** = A potentially serious problem, consider carefully  
 5 **ALERT level C** = Check. Ensure it is not caused by an omission or oversight  
 33 **ALERT level G** = General information/check it is not something unexpected

4 ALERT type 1 CIF construction/syntax error, inconsistent or missing data  
 10 ALERT type 2 Indicator that the structure model may be wrong or deficient  
 7 ALERT type 3 Indicator that the structure quality may be low  
 17 ALERT type 4 Improvement, methodology, query or suggestion  
 0 ALERT type 5 Informative message, check

---

It is advisable to attempt to resolve as many as possible of the alerts in all categories. Often the minor alerts point to easily fixed oversights, errors and omissions in your CIF or refinement strategy, so attention to these fine details can be worthwhile. In order to resolve some of the more serious problems it may be necessary to carry out additional measurements or structure refinements. However, the purpose of your study may justify the reported deviations and the more serious of these should normally be commented upon in the discussion or experimental section of a paper or in the "special\_details" fields of the CIF. checkCIF was carefully designed to identify outliers and unusual parameters, but every test has its limitations and alerts that are not important in a particular case may appear. Conversely, the absence of alerts does not guarantee there are no aspects of the results needing attention. It is up to the individual to critically assess their own results and, if necessary, seek expert advice.

### **Publication of your CIF in IUCr journals**

A basic structural check has been run on your CIF. These basic checks will be run on all CIFs submitted for publication in IUCr journals (*Acta Crystallographica*, *Journal of Applied Crystallography*, *Journal of Synchrotron Radiation*); however, if you intend to submit to *Acta Crystallographica Section C* or *E* or *IUCrData*, you should make sure that full publication checks are run on the final version of your CIF prior to submission.

### **Publication of your CIF in other journals**

Please refer to the *Notes for Authors* of the relevant journal for any special instructions relating to CIF submission.

Z 21

```

Prob = 50
Temp = 100

```

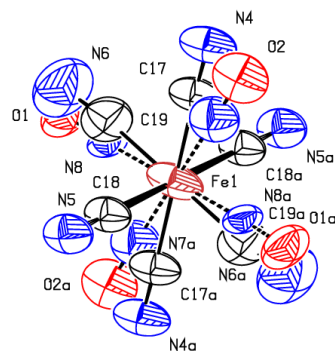

RES= 0 -11 X
